# Supplementary material for: Multiple-stable anisotropic magnetoresistance memory in antiferromagnetic MnTe
Source: PubMed Central journal article supplement (PMC4906165; doi:10.1038/ncomms11623), 2016-06-09
Supplement: ncomms11623-s2.pdf [file ncomms11623-s2.pdf]

**Editorial Note:** this manuscript has been previously reviewed at another journal that is not operating a transparent peer review scheme. This document only contains reviewer comments and rebuttal letters for versions considered at Nature Communications.

**Reviewer #1 (Remarks to the Author)**

Authors responded to my comments and questions satisfactorily. I would like to recommend the publication in Nature Communications.

**Authors response:**

We thank the referees for their constructive feedback during the review process.
